# Supplementary material for: Author-level data confirm the widening gender gap in publishing rates during COVID-19
Source: eLife. 2022 Mar 16;11:e76559. doi: 10.7554/eLife.76559 (PMC8942470; doi:10.7554/eLife.76559)
Supplement: Figure 2—source data 1. [file elife-76559-fig2-data1.docx]

**Figure 2-source data 1.** OLS linear regression with full count as dependent variable. Linear regression with author and year fixed effects. Standard errors are HC1 and clustered at the author level.

|  | **Coef.** | **S.E.** | **t-value** | ***Pr(T ≥|t|)*** |
| --- | --- | --- | --- | --- |
| Gender x 2016 | 0.0659 | 0.0060 | 10.957 | 0.0000 |
| Gender x 2017 | 0.0199 | 0.0058 | 3.4522 | 0.0006 |
| Gender x 2018 | 0.0065 | 0.0058 | 1.1235 | 0.2612 |
| Gender x 2019 | Ref. | Ref. | Ref. | Ref. |
| Gender x 2020 | -0.0940 | 0.0057 | -16.530 | 0.0000 |
| Num. obs. | 2,041,260 |  |  |  |
| Num. clusters | 408,252 |  |  |  |
| RMSE | 1.1918 |  |  |  |
| Adj *R2* | 0.516713 |  |  |  |
| Within *R2* | 0.0005 |  |  |  |
